# Supplementary material for: Noble-metal-free NiFe nanoparticles immobilized on nano CeZrO2solid solutions for highly efficient hydrogen production from hydrous hydrazine
Source: Royal Society of Chemistry journal article supplement (doi:10.1039/c9se00547a), 2019-01-01
Supplement: c9se00547a1.pdf [file c9se00547a1.pdf]

**Noble-metal-free NiFe nanoparticles immobilized on nano CeZrO<sub>2</sub>  
solid solutions for highly efficient hydrogen production from hydrous  
hydrazine**

Hongtao Zou, Qilu Yao, Meiling Huang, Meihua Zhu, Fei Zhang, Zhang-Hui Lu\*

*Institute of Advanced Materials (IAM), College of Chemistry and Chemical  
Engineering, Jiangxi Normal University, Nanchang 330022, P.R. China.*

E-mail: luzh@jxnu.edu.cn

### Synthesis of Ce<sub>1-x</sub>Zr<sub>x</sub>O<sub>2</sub> solid solutions

Typically, 1.0 g of Pluronic 123 was dissolved in 10 mL of ethanol with vigorous stirring at 35 °C for 2 h. Then 10 mL quantitative amounts of Ce(NO<sub>3</sub>)<sub>3</sub>·6H<sub>2</sub>O and ZrOCl<sub>2</sub>·8H<sub>2</sub>O alcohol solution are dropped slowly into the above solution (total amount of Ce plus Zr is 10 mmol). After being stirred for 4 h, the homogeneous sol was transferred to an oven and underwent solvent evaporation. After aging for 48 h at 40 °C, the gel product were calcined by slowly increasing the temperature from room temperature to 400 °C (1 °C/min ramping rate) and holding at 400 °C for 4 h in muffle furnace to obtain Ce<sub>1-x</sub>Zr<sub>x</sub>O<sub>2</sub> solid solutions, where  $x$  is the mole ratio of Zr to (Ce + Zr) in the catalysts. For comparison, with different rare earth groups, La<sub>0.9</sub>Zr<sub>0.1</sub>O<sub>2</sub> and Nd<sub>0.9</sub>Zr<sub>0.1</sub>O<sub>2</sub> were also prepared by the same method as Ce<sub>0.9</sub>Zr<sub>0.1</sub>O<sub>2</sub> replacing Ce(NO<sub>3</sub>)<sub>3</sub>·6H<sub>2</sub>O with La(NO<sub>3</sub>)<sub>3</sub>·6H<sub>2</sub>O and Nd(NO<sub>3</sub>)<sub>3</sub>·6H<sub>2</sub>O, respectively.

### Calculation method for TOF

The turnover frequency (TOF) reported in this work is an apparent TOF value based on the number of (Ni + Fe) atoms in the catalyst, which is calculated from the equation as follows:

$$\text{TOF} = \frac{2 P_0 V}{3 R T n_{\text{NiFe}} t}$$

$P_0$  is the atmospheric pressure (101325 Pa),  $V$  is the volume of generated gas (H<sub>2</sub> + N<sub>2</sub>) when the conversion reached 50%,  $R$  is the universal gas constant (8.3145 m<sup>3</sup>·Pa·mol<sup>-1</sup>·K<sup>-1</sup>),  $T$  is the room temperature (298 K),  $n_{\text{NiFe}}$  is the total number of moles of (Ni + Fe) atoms in the catalyst and  $t$  is the reaction time when the conversion reached 50%.

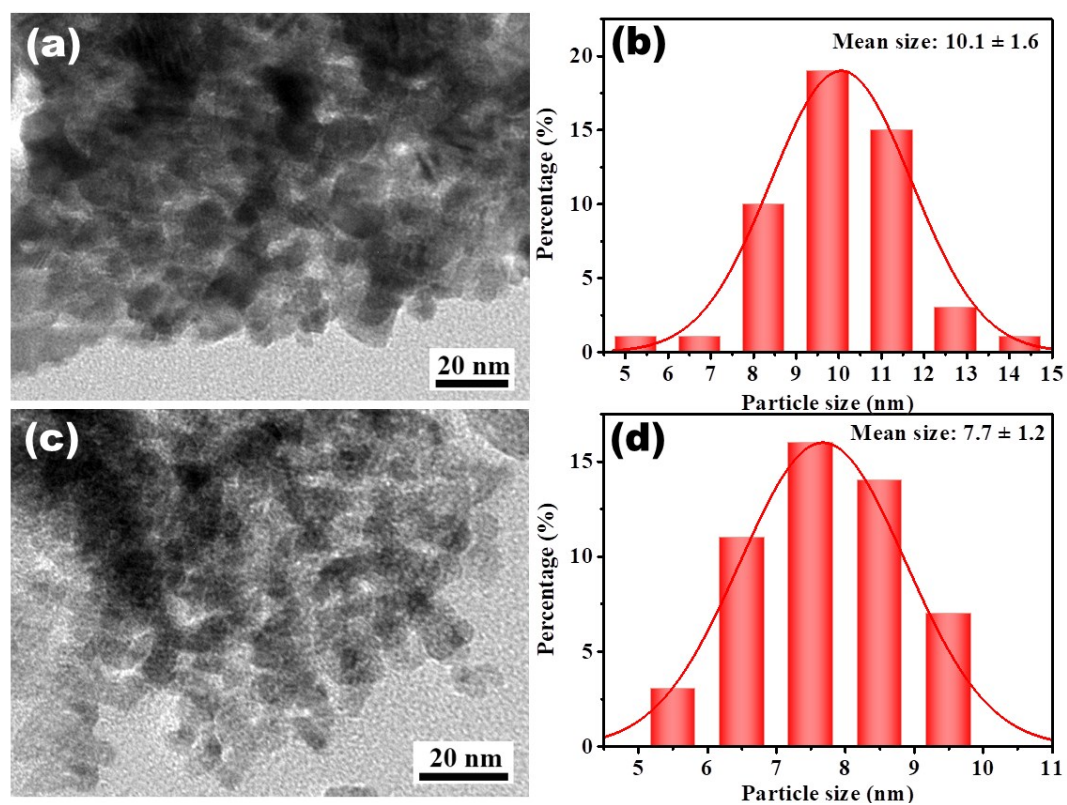

**Fig. S1** TEM images and the corresponding particle size distribution of the as-synthesized (a,b) CeO<sub>2</sub> and (c,d) ZrO<sub>2</sub>.

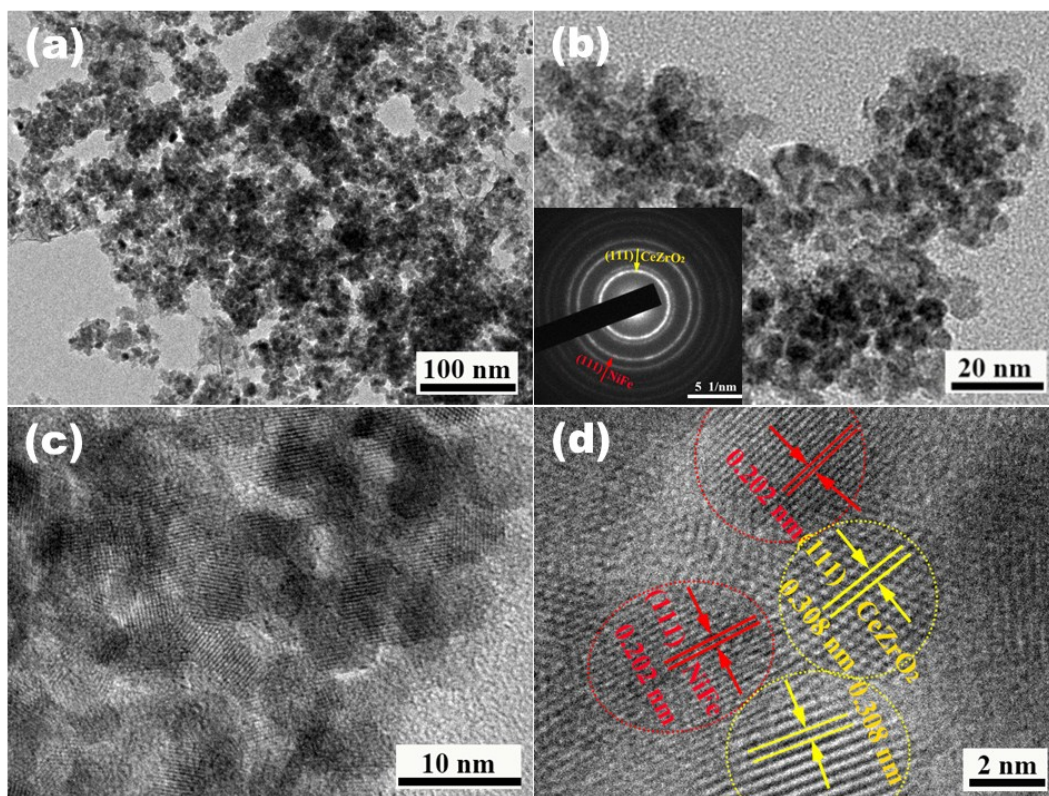

**Fig. S2** (a,b) TEM images and (c,d) high-resolution TEM images of the as-synthesized NiFe/CeZrO<sub>2</sub> catalyst. The inset of (b) shows the corresponding SAED pattern.

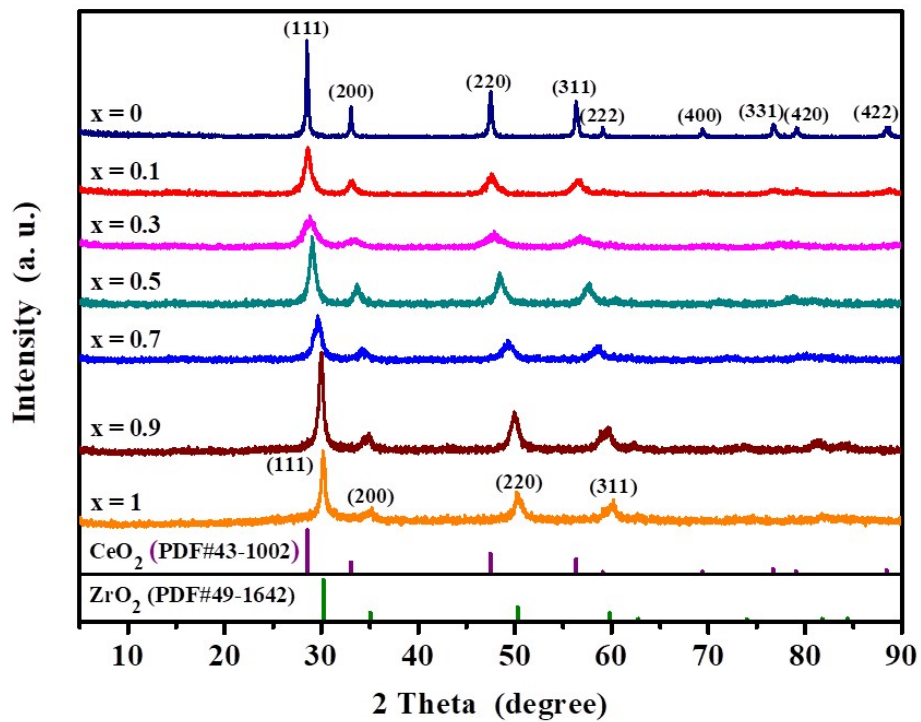

**Fig. S3** Powder XRD patterns of the as-synthesized nano  $\text{Ce}_{1-x}\text{Zr}_x\text{O}_2$  solid solutions ( $x = 0, 0.1, 0.3, 0.5, 0.7, 0.9$  and  $1.0$ ).

The diffraction peaks at  $28.52^\circ$ ,  $33.08^\circ$ ,  $47.52^\circ$ ,  $56.40^\circ$ ,  $59.08^\circ$ ,  $69.40^\circ$ ,  $76.70^\circ$ ,  $79.12^\circ$  and  $88.38^\circ$  were assigned to the (111), (200), (220), (311), (222), (400), (331), (420) and (422) crystal facets of  $\text{CeO}_2$ .

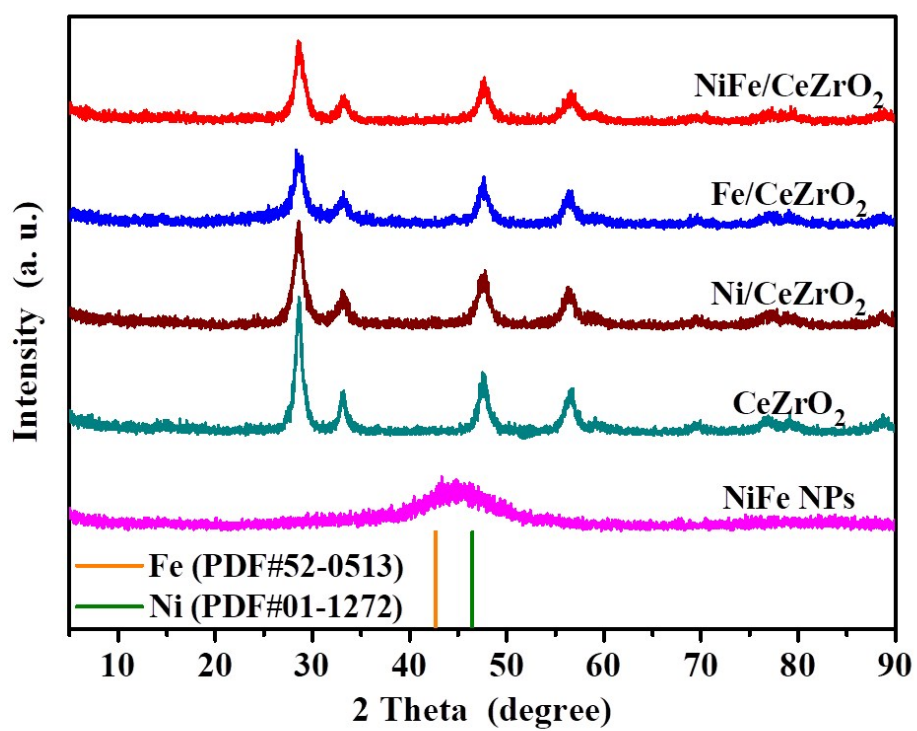

**Fig. S4** Powder XRD patterns of the as-synthesized catalysts.

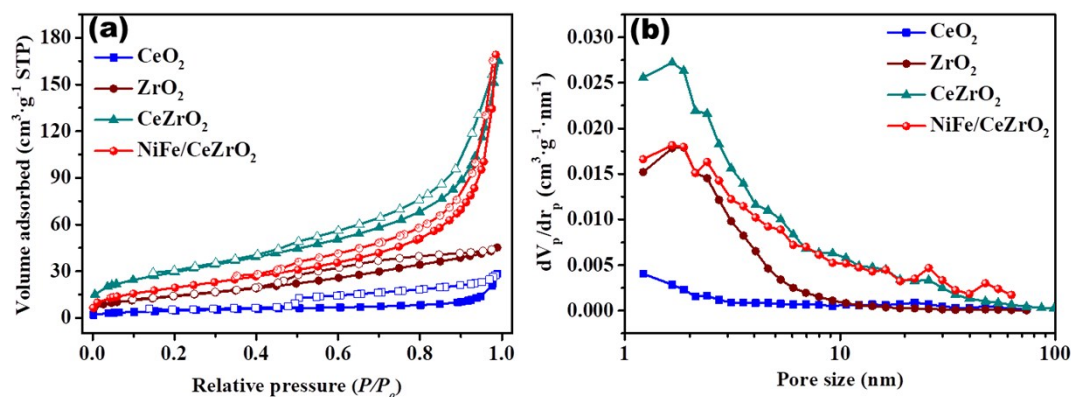

**Fig. S5** (a) Nitrogen sorption isotherms and (b) the corresponding pore size distribution curves of  $\text{CeO}_2$ ,  $\text{ZrO}_2$ ,  $\text{CeZrO}_2$  and  $\text{NiFe/CeZrO}_2$  catalysts.

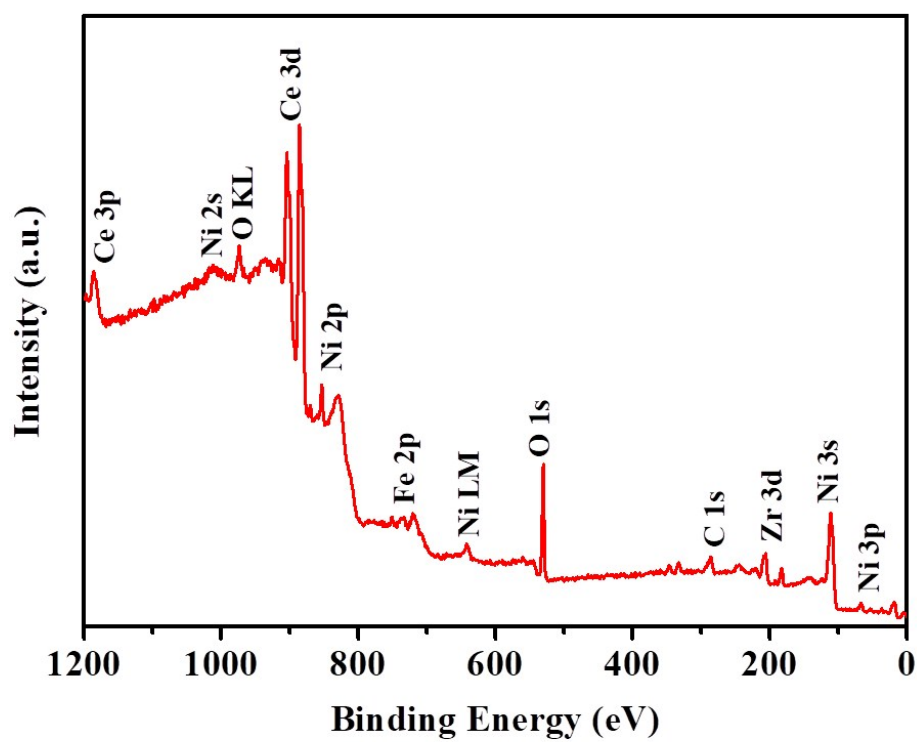

**Fig. S6** The survey XPS spectrum of NiFe/CeZrO<sub>2</sub> catalyst.



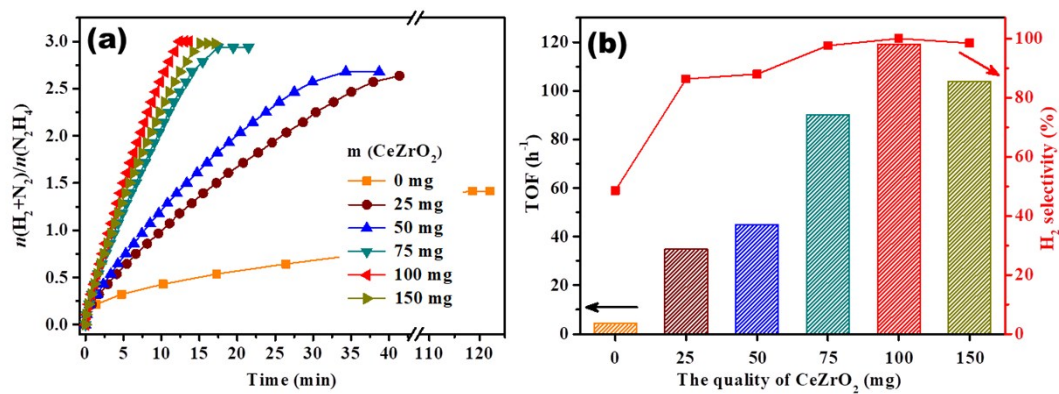

**Fig. S7** (a) Time course plots and (b) the corresponding TOF values and  $\text{H}_2$  selectivity for  $\text{H}_2$  release from  $\text{N}_2\text{H}_4$  aqueous solution (200 mM, 10 mL) over  $\text{NiFe/CeZrO}_2$  catalysts with different  $\text{CeZrO}_2$  contents in the presence of  $\text{NaOH}$  (2.5 M) at 343 K ( $n_{\text{NiFe}}/n_{\text{N}_2\text{H}_4 \cdot \text{H}_2\text{O}} = 0.1$ ).

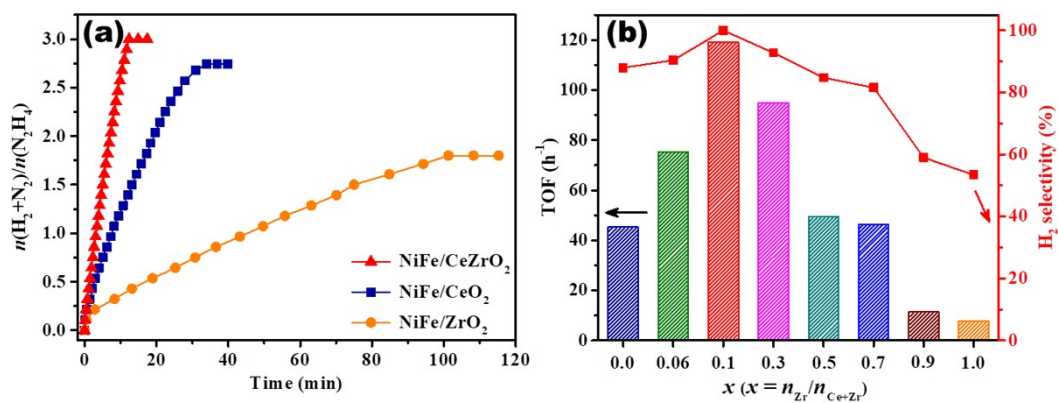

**Fig. S8** (a) Time course plots for H<sub>2</sub> release from N<sub>2</sub>H<sub>4</sub> aqueous solution (200 mM, 10 mL) over NiFe/CeZrO<sub>2</sub>, NiFe/CeO<sub>2</sub> and NiFe/ZrO<sub>2</sub> catalysts with NaOH (2.5 M) at 343 K ( $n_{\text{NiFe}}/n_{\text{N}_2\text{H}_4 \cdot \text{H}_2\text{O}} = 0.1$ ). (b) The TOF values and corresponding H<sub>2</sub> selectivity for dehydrogenation of N<sub>2</sub>H<sub>4</sub> aqueous solution over NiFe/Ce<sub>1-x</sub>Zr<sub>x</sub>O<sub>2</sub> with different Ce and Zr contents.

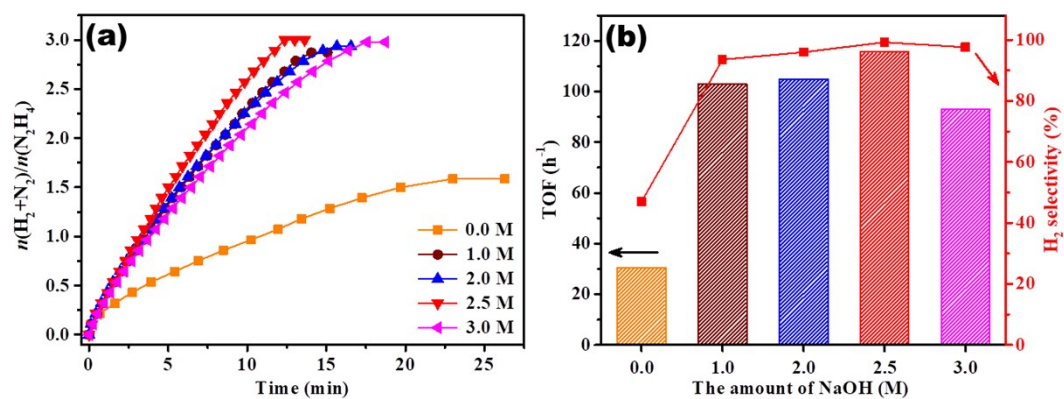

**Fig. S9** (a) Time course plots and (b) the corresponding TOF values and H<sub>2</sub> selectivity for H<sub>2</sub> release from N<sub>2</sub>H<sub>4</sub> aqueous solution (200 mM, 10 mL) over NiFe/CeZrO<sub>2</sub> catalyst with different concentration of NaOH at 343 K ( $m_{\text{CeZrO}_2} = 100$  mg,  $n_{\text{NiFe}}/n_{\text{N}_2\text{H}_4 \cdot \text{H}_2\text{O}} = 0.1$ ).

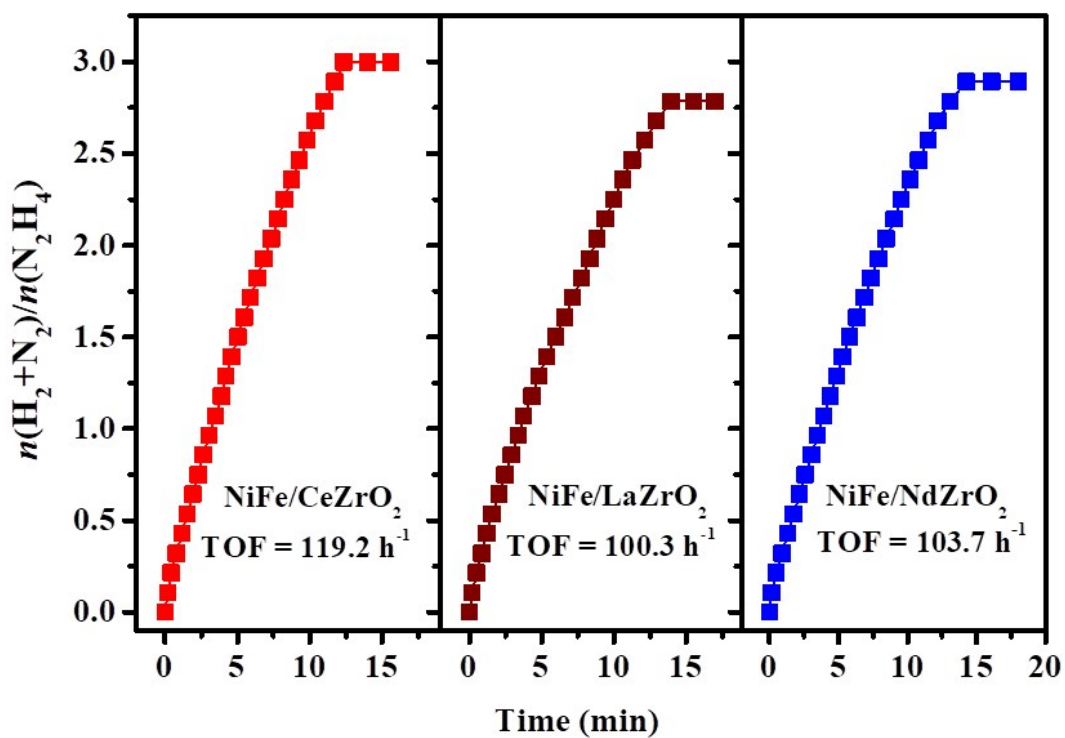

**Fig. S10** Time course plots for H<sub>2</sub> release from N<sub>2</sub>H<sub>4</sub> aqueous solution (200 mM, 10 mL) over the NiFe/ReZrO<sub>2</sub> catalysts (Re = Ce, La, Nd) with NaOH (2.5 M) at 343 K ( $m_{\text{ReZrO}_2} = 100$  mg,  $n_{\text{NiFe}}/n_{\text{N}_2\text{H}_4 \cdot \text{H}_2\text{O}} = 0.1$ ).

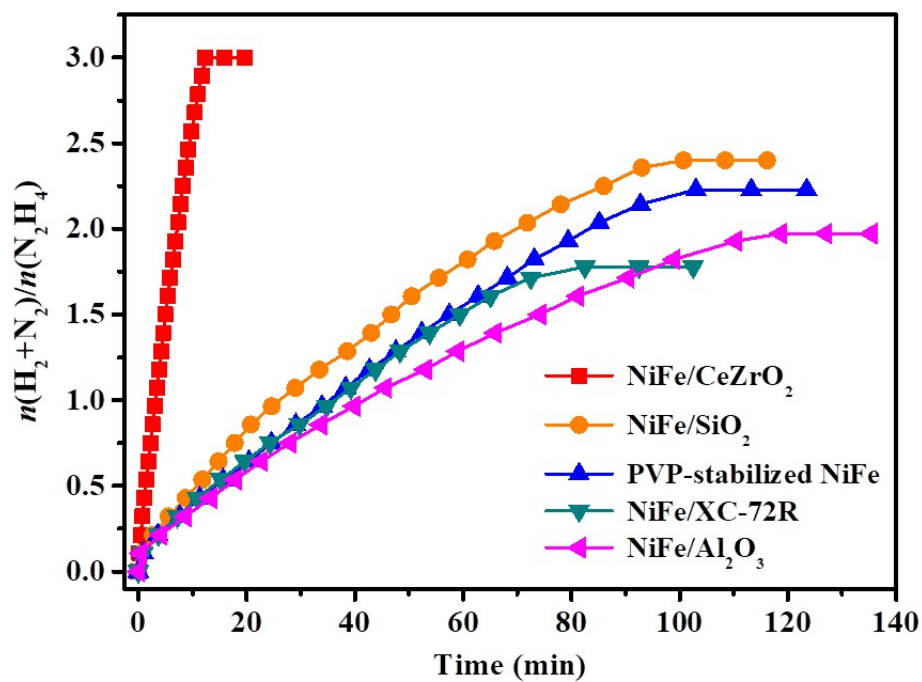

**Fig. S11** Time course plots for H<sub>2</sub> release from N<sub>2</sub>H<sub>4</sub> aqueous solution (200 mM, 10 mL) over NiFe supported by different supports with NaOH (2.5 M) at 343 K ( $n_{\text{NiFe}}/n_{\text{N}_2\text{H}_4 \cdot \text{H}_2\text{O}} = 0.1$ ).

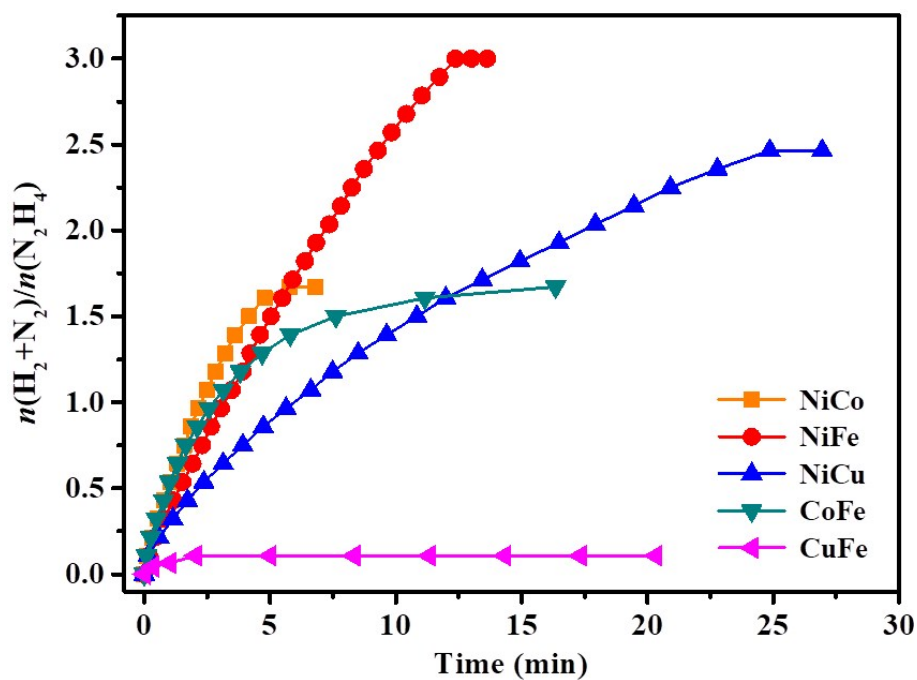

**Fig. S12** Time course plots for H<sub>2</sub> release from N<sub>2</sub>H<sub>4</sub> aqueous solution (200 mM, 10 mL) over NiCo/CeZrO<sub>2</sub>, NiFe/CeZrO<sub>2</sub>, NiCu/CeZrO<sub>2</sub>, CoFe/CeZrO<sub>2</sub> and CuFe/CeZrO<sub>2</sub> catalysts with NaOH (2.5 M) at 343 K ( $m_{\text{CeZrO}_2} = 100$  mg,  $n_{\text{NiFe}}/n_{\text{N}_2\text{H}_4 \cdot \text{H}_2\text{O}} = 0.1$ ).

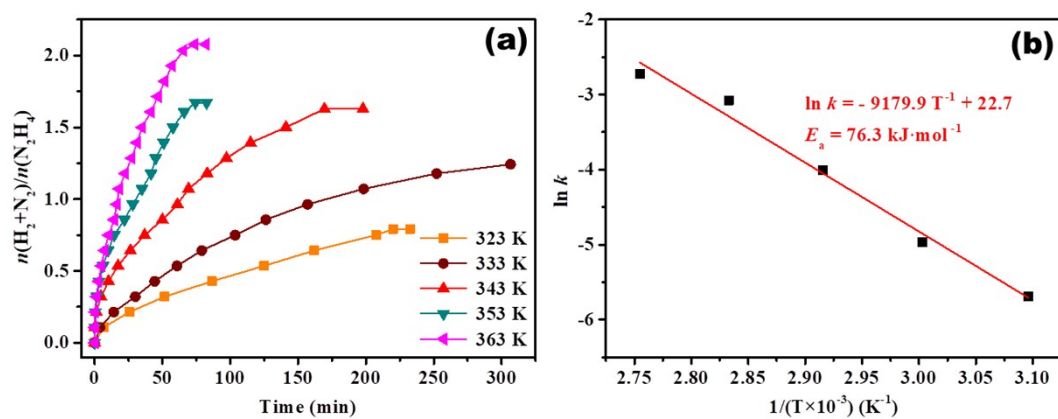

**Fig. S13** (a) Time course plots (b) arrhenius plots for  $\text{H}_2$  release from  $\text{N}_2\text{H}_4$  aqueous solution (200 mM, 10 mL) over NiFe NPs with NaOH (2.5 M) at different temperatures ( $n_{\text{NiFe}}/n_{\text{N}_2\text{H}_4 \cdot \text{H}_2\text{O}} = 0.1$ ).

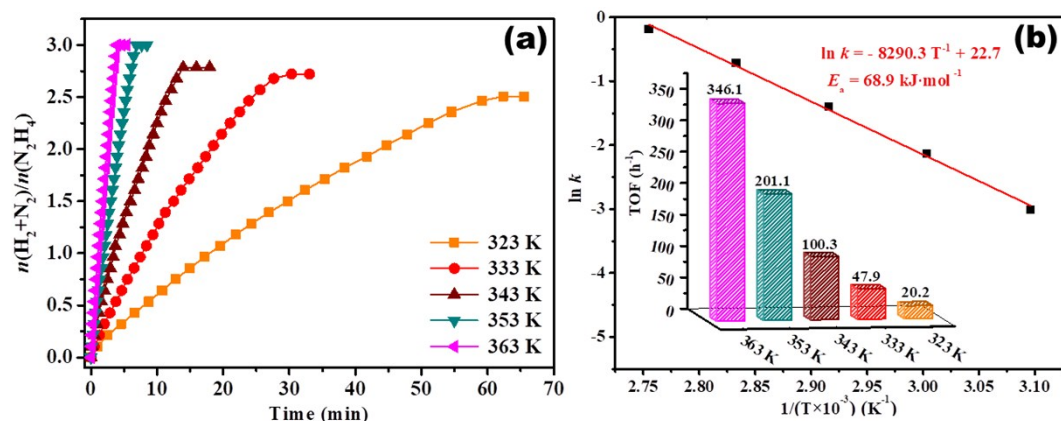

**Fig. 14** (a) Time course plots for H<sub>2</sub> release from N<sub>2</sub>H<sub>4</sub> aqueous solution (200 mM, 10 mL) over the NiFe/LaZrO<sub>2</sub> catalyst with NaOH (2.5 M) at different temperatures. (b) Arrhenius plots and (inset) the corresponding TOF values ( $m_{\text{LaZrO}_2} = 100 \text{ mg}$ ,  $n_{\text{NiFe}}/n_{\text{N}_2\text{H}_4 \cdot \text{H}_2\text{O}} = 0.1$ ).



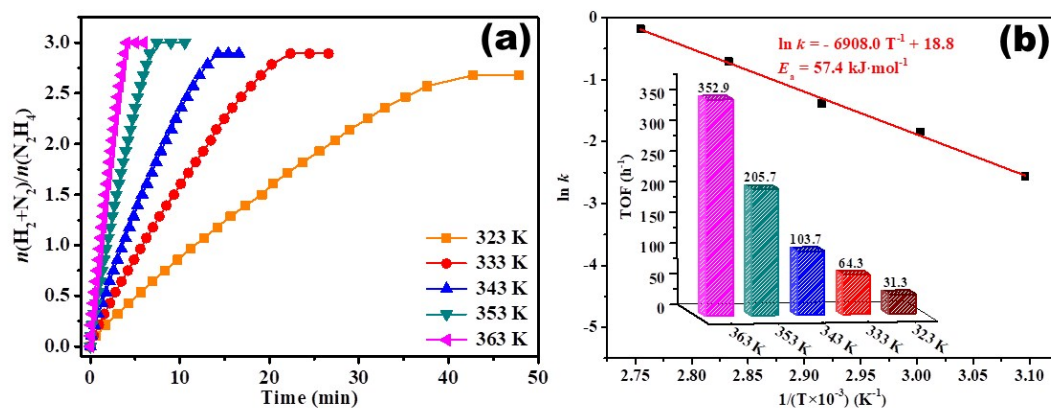

**Fig. 15** (a) Time course plots for H<sub>2</sub> release from N<sub>2</sub>H<sub>4</sub> aqueous solution (200 mM, 10 mL) over the NiFe/NdZrO<sub>2</sub> catalyst with NaOH (2.5 M) at different temperatures. (b) Arrhenius plots and (inset) the corresponding TOF values ( $m_{\text{NdZrO}_2} = 100 \text{ mg}$ ,  $n_{\text{NiFe}}/n_{\text{N}_2\text{H}_4 \cdot \text{H}_2\text{O}} = 0.1$ ).

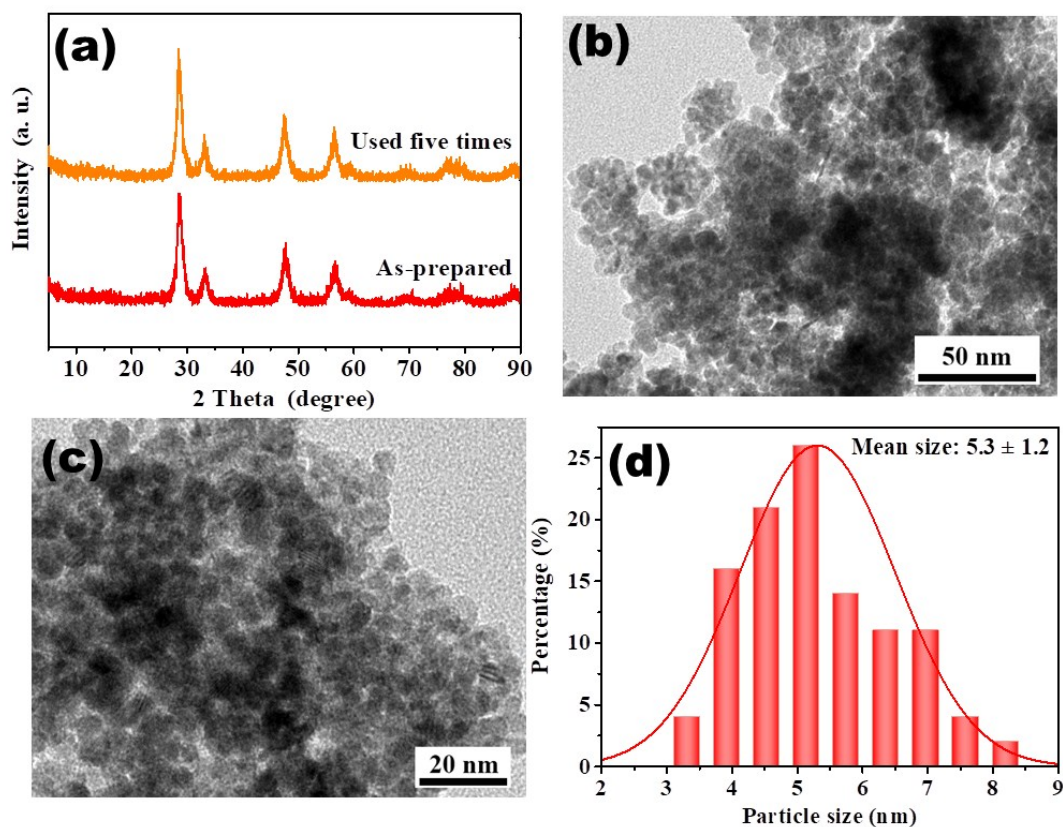

**Fig. S16** (a) Powder XRD patterns of the as-synthesized NiFe/CeZrO<sub>2</sub> catalysts before and after five times used; (b,c) TEM images of the NiFe/CeZrO<sub>2</sub> catalyst used five times and (d) the corresponding particle size distribution.

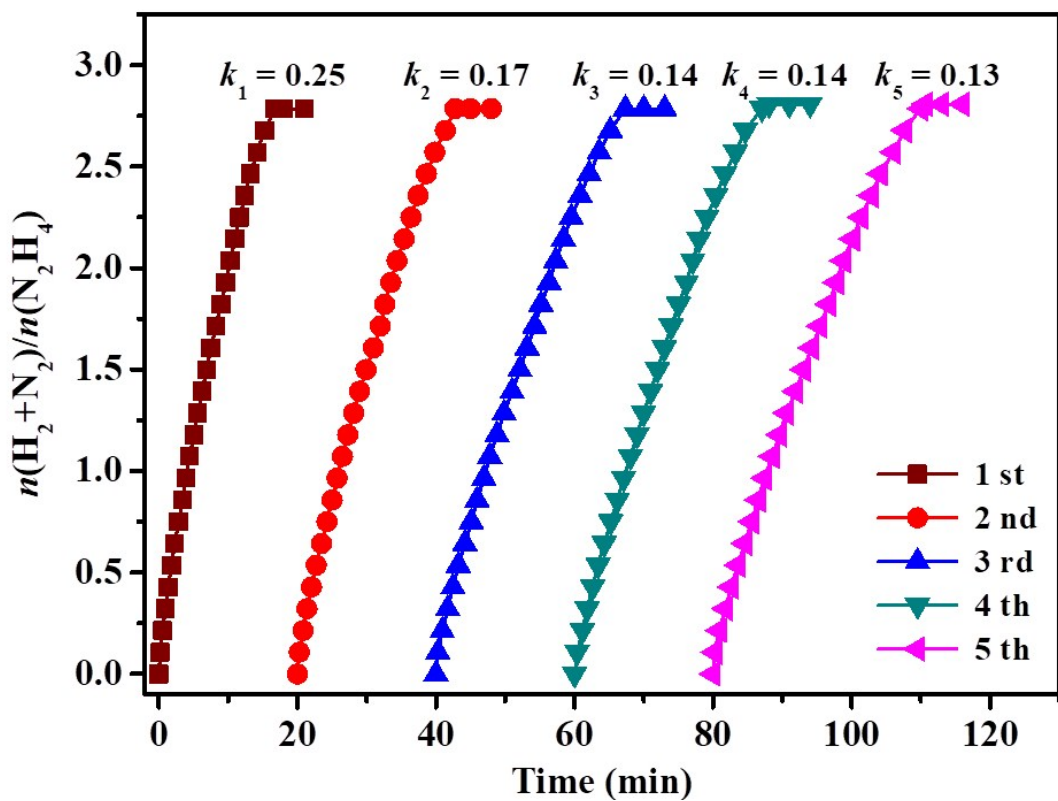

**Fig. S17** Stability test for  $\text{H}_2$  release from  $\text{N}_2\text{H}_4$  aqueous solution over the NiFe/LaZrO<sub>2</sub> catalyst with NaOH (2.5 M) at 343 K.

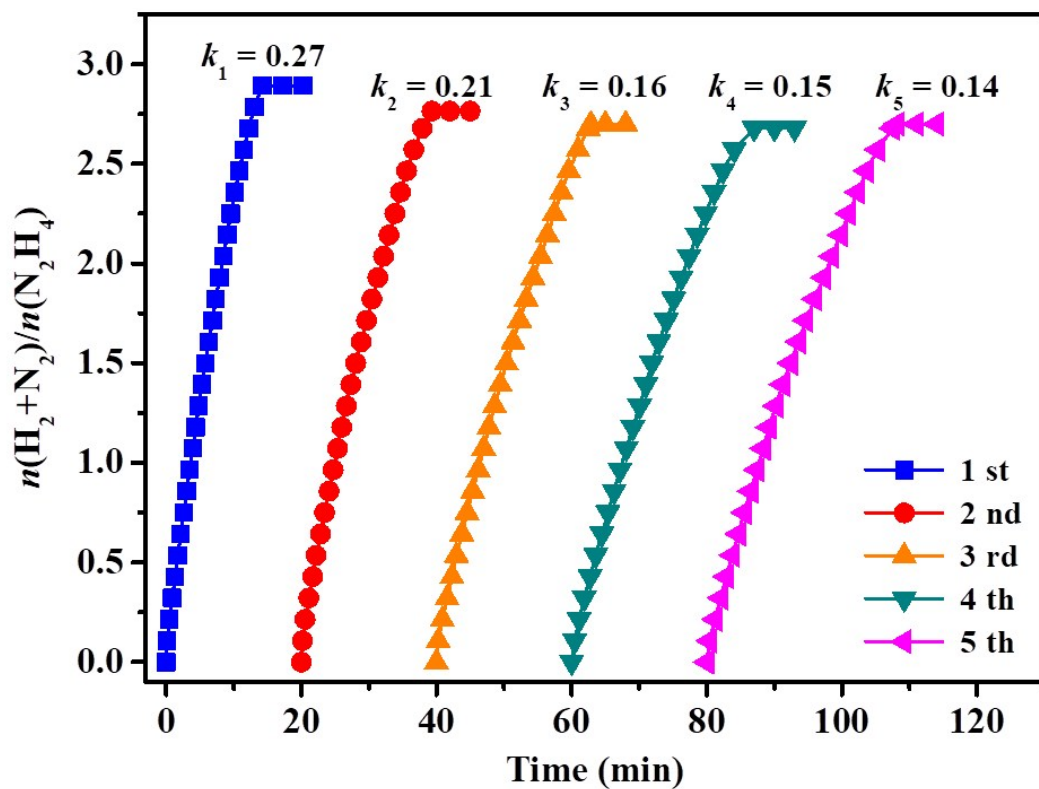

**Fig. S18** Stability test for  $\text{H}_2$  release from  $\text{N}_2\text{H}_4$  aqueous solution over the  $\text{NiFe/NdZrO}_2$  catalyst with  $\text{NaOH}$  (2.5 M) at 343 K.

**Table S1.** Catalysts composition determined by inductively coupled plasma atomic emission spectroscopic (ICP-OES).

| Catalysts                           | Ni (wt%) | Fe (wt%) | Ni/Fe (molar ratio) |
|-------------------------------------|----------|----------|---------------------|
| Fe                                  | -        | 10.25    | -                   |
| Ni <sub>0.2</sub> Fe <sub>0.8</sub> | 2.76     | 9.02     | 0.23/0.77           |
| Ni <sub>0.4</sub> Fe <sub>0.6</sub> | 4.32     | 6.83     | 0.38/0.62           |
| Ni <sub>0.6</sub> Fe <sub>0.4</sub> | 6.96     | 4.50     | 0.60/0.40           |
| Ni <sub>0.7</sub> Fe <sub>0.3</sub> | 8.06     | 3.47     | 0.69/0.21           |
| Ni <sub>0.8</sub> Fe <sub>0.2</sub> | 9.11     | 2.41     | 0.78/0.22           |
| Ni <sub>0.9</sub> Fe <sub>0.1</sub> | 10.08    | 1.39     | 0.87/0.13           |
| Ni                                  | 11.26    | -        | -                   |

**Table S2.** BET surface area, pore volume and pore diameter of different samples.

| Samples                 | BET surface area (m <sup>2</sup> .g <sup>-1</sup> ) | Pore volume (cm <sup>3</sup> .g <sup>-1</sup> ) |
|-------------------------|-----------------------------------------------------|-------------------------------------------------|
| CeZrO <sub>2</sub>      | 108.6                                               | 0.2526                                          |
| NiFe/CeZrO <sub>2</sub> | 74.2                                                | 0.2614                                          |
| ZrO <sub>2</sub>        | 52.2                                                | 0.0699                                          |
| CeO <sub>2</sub>        | 16.9                                                | 0.0438                                          |

**Table S3.** Catalytic activities of as-synthesized catalysts toward the dehydrogenation of  $\text{N}_2\text{H}_4$  in aqueous solution compared to other reported catalysts.

| Catalysts                                                        | T (K) | NaOH (M) | Selectivity (%) | TOF ( $\text{h}^{-1}$ ) | Ref.      |
|------------------------------------------------------------------|-------|----------|-----------------|-------------------------|-----------|
| NiFe                                                             | 343   | 0.5      | 100             | 6.3                     | SI        |
| Ni/ $\text{Al}_2\text{O}_3$                                      | 303   | -        | 93              | 2.2                     | S2        |
| $\text{Ni}_{0.080}/\text{CeO}_2$                                 | 303   | -        | >99             | 51.6                    | S3        |
| $\text{Ni}_{0.5}\text{Cu}_{0.5}/\text{MCNS}$                     | 333   | 0.5      | 100             | 21.8                    | S4        |
| $\text{Ni}_{1.5}\text{Fe}_{1.0}\text{-alloy}/(\text{MgO})_{3.5}$ | 299   | -        | 99              | 10.9                    | S5        |
| NiFe/Cu                                                          | 343   | -        | 100             | 35.3                    | S6        |
| $\text{Cu}@ \text{Fe}_5\text{Ni}_5$                              | 343   | 0.1      | 100             | 18.2                    | S7        |
| $\text{Ni}_{0.6}\text{Fe}_{0.4}\text{Mo}$                        | 323   | 1.8      | 100             | 28.8                    | S8        |
| 2D NiFe/ $\text{CeO}_2$                                          | 323   | -        | 99              | 11.5                    | S9        |
| $\text{Ni}_3\text{Fe}-(\text{CeO}_x)_{0.15}/\text{rGO}$          | 343   | 1.0      | 100             | 126.2                   | S10.      |
| NiCo/NiO- $\text{CoO}_x$                                         | 298   | -        | 99              | 11.0                    | S11       |
| NiMoB- $\text{La}(\text{OH})_3$                                  | 323   | 2.0      | 100             | 13.3                    | S12       |
| NiFe/ $\text{CeZrO}_2$                                           | 343   | 2.5      | 100             | 119.2                   | This work |
| NiFe/ $\text{LaZrO}_2$                                           | 343   | 2.5      | 91              | 100.3                   | This work |
| NiFe/ $\text{NdZrO}_2$                                           | 343   | 2.5      | 96              | 103.7                   | This work |

## References

- S1 S. K. Singh, A. K. Singh, K. Aranishi and Q. Xu, *J. Am. Chem. Soc.*, 2011, **133**, 19638-19641.
- S2 L. He, Y. Q. Huang, A. Q. Wang, X. D. Wang, X. W. Chen, J. Jose Delgado and T. Zhang, *Angew. Chem., Int. Ed.*, 2012, **51**, 6191-6194.
- S3 L. He, B. L. Liang, L. Li, X. F. Yang, Y. Q. Huang, A. Q. Wang, X. D. Wang and T. Zhang, *ACS Catal.*, 2015, **5**, 1623-1628.
- S4 H. Yen, Y. Seo, S. Kaliaguine and F. Kleitz, *ACS Catal.*, 2015, **5**, 5505-5511.
- S5 W. Gao, C.M. Li, H. Chen, M. Wu, S. He, Wei M, D. G. Evans and X. Duan, *Green Chem.*, 2014, **16**, 1560-1568.
- S6 K. V. Manukyan, A. Cross, S. Rouvimov, J. Miller, A. S. Mukasyan and E. E. Wolf, *Appl. Catal., A*, 2014, **476**, 47-53.
- S7 J. Wang, Y. Li and Y. Zhang, *Adv. Funct. Mater.*, 2014, **24**, 7073-7077.
- S8 H. L. Wang, J. M. Yan, S. J. Li, X. W. Zhang and Q. Jiang, *J. Mater. Chem. A*, 2015, **3**, 121-124.
- S9 D. D. Wu, M. Wen, C. Gu and Q. S. Wu, *ACS Appl. Mater. Interfaces*, 2017, **9**, 16103-16108.
- S10 Y. N. Men, X. Q. Du, G. Z. Cheng and W. Luo, *Int. J. Hydrogen Energy*, 2017, **42**, 27165-27173.
- S11 D. D. Wu, M. Wen, X. J. Lin, Q. S. Wu, C. Gu and H. X. Chen, *J. Mater. Chem. A*, 2016, **4**, 6595-6602.
- S12 J. J. Zhang, Q. Kang, Z. Q. Yang, H. B. Dai, D. W. Zhuang and P. Wang, *J. Mater. Chem. A*, 2013, **1**, 11623-11628.
